# Supplementary material for: Integrated Microarray-Based Data Analysis of miRNA Expression Profiles: Identification of Novel Biomarkers of Cisplatin-Resistance in Testicular Germ Cell Tumours
Source: MDPI journal article supplement (doi:10.3390/ijms24032495), 2023-01-27
Supplement: s1 [file s1]

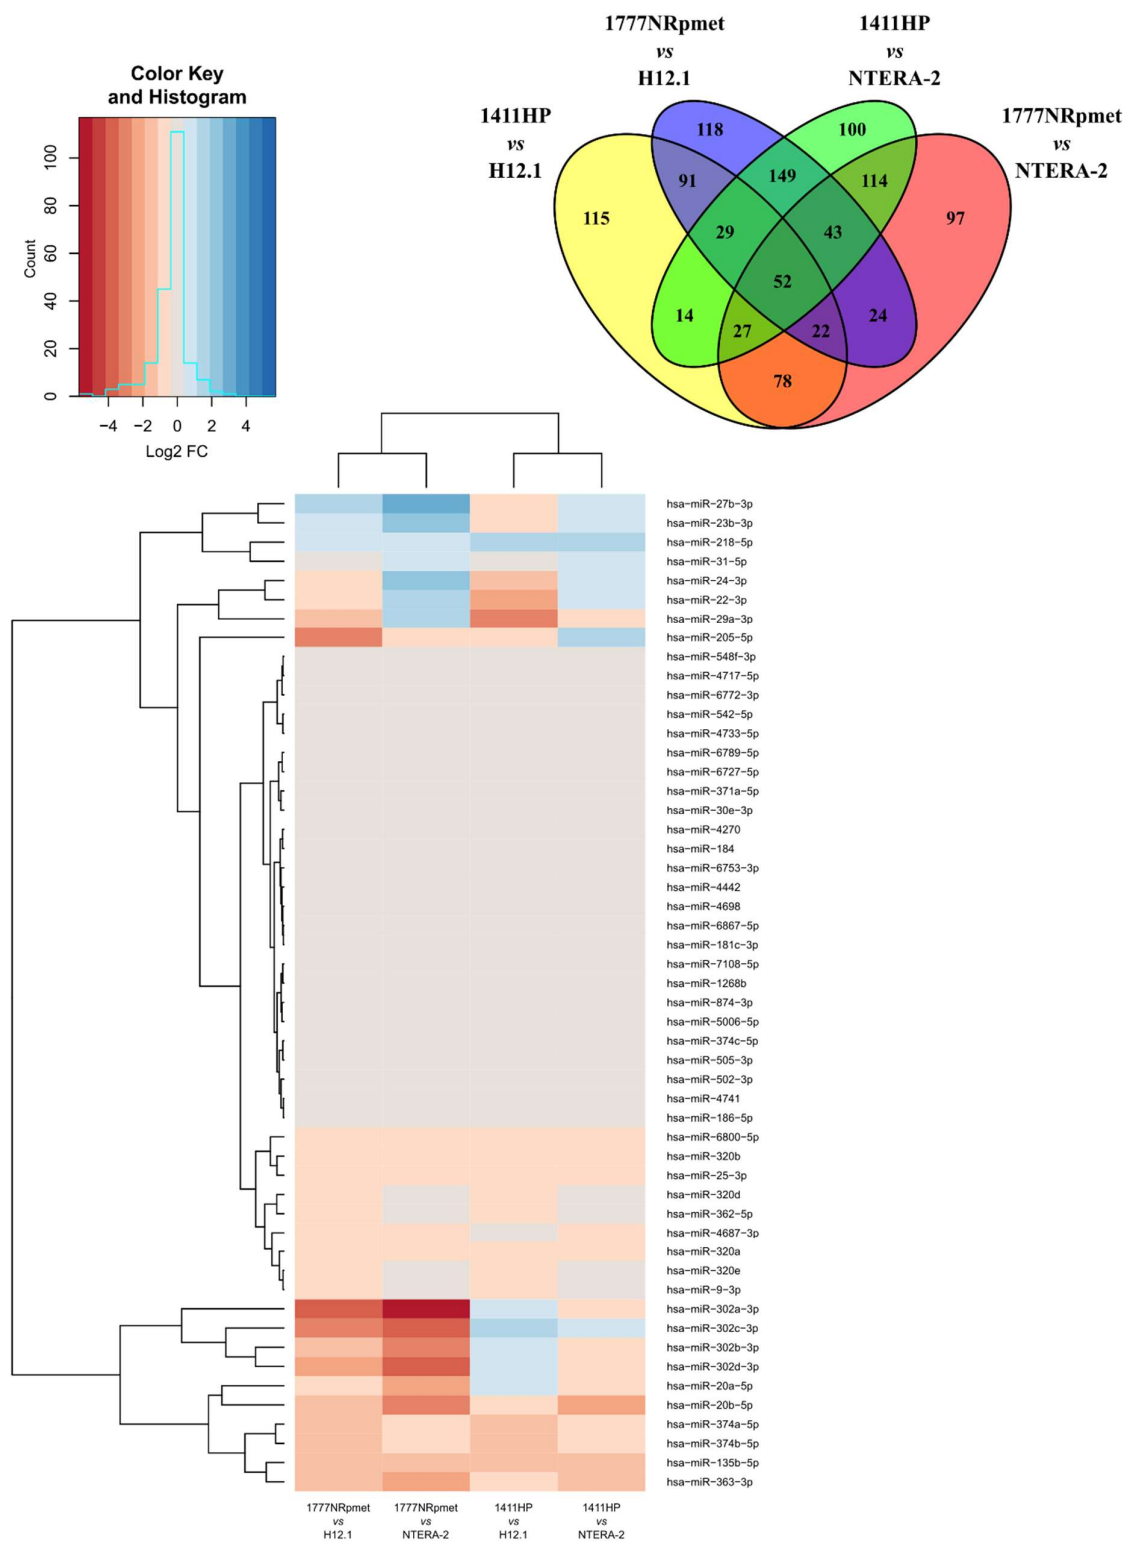

**Supplementary Figure S1: Venn diagram and heatmap of overlapping miRNA in CDDP-resistant vs. -sensitive TGCT cell lines.** Venn diagram analysis of two CDDP-resistant cell lines reveals 52 miRNAs whose expression was significantly changed ( $p < 0.05$ ) in 1411HP and 1777NRpmet when pairwise combined with H12.1 and NTERA-2 cell lines. The common miRNAs are presented by overlapping overexpressed miRNAs in analysed TGCT cell lines. 1411HP vs. H12.1 (yellow), 1777NRpmet vs. H12.1 (blue), 1411HP vs. NTERA-2 (green) and 1777NRpmet vs. NTERA-2 (red). Heatmap illustrates 52 common differentially expressed miRNA with log2 transformed mean FC ( $p < 0.05$ ) in CDDP-resistant TGCT cell lines 1411HP and 1

1777NRpmet in comparison with -sensitive TGCT cell lines H12.1 and NTERA-2. Red colour indicates decreased relative expression and blue colour indicates increased relative expression.

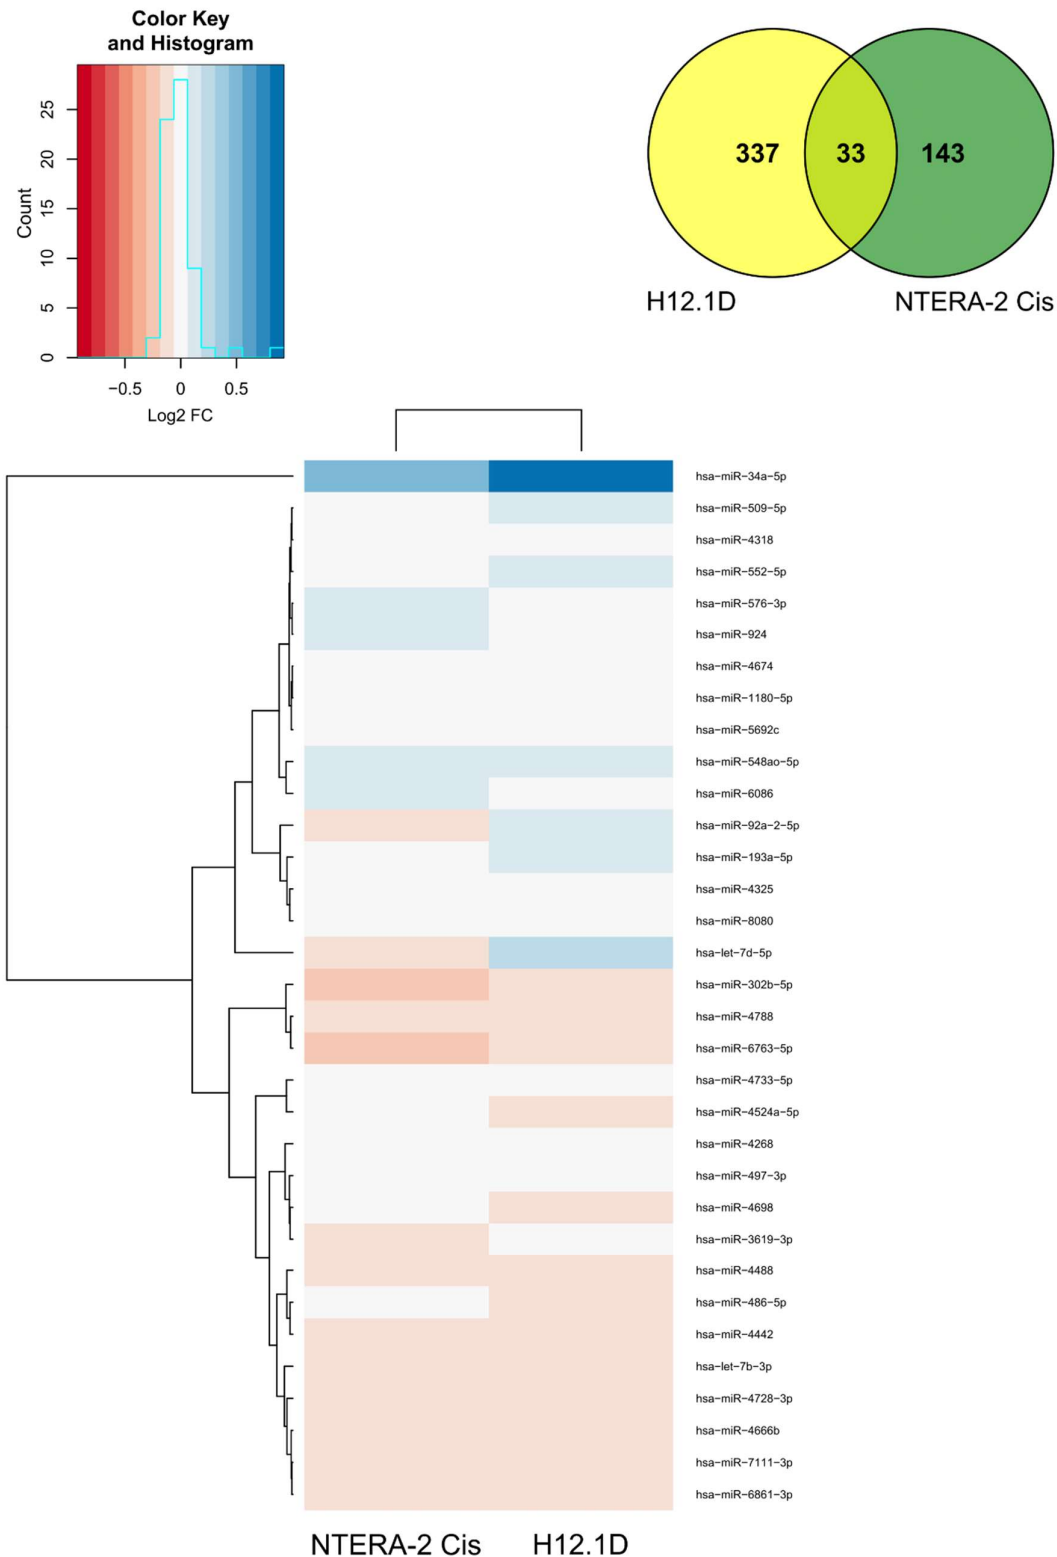

**Supplementary Figure S2: Venn diagram and heatmap of overlapping miRNA in CDDP-resistant vs. -sensitive TGCT cell lines.** Venn diagram analysis of two CDDP-resistant isogenic cell lines reveals 33 miRNAs whose expression was significantly changed ( $p < 0.05$ ) in H12.1D vs. H12.1 and NTERA-2 Cis vs. NTERA-2 cell lines. The common miRNAs are presented by overlapping overexpressed miRNAs in analysed 3

TGCT cell lines: H12.1 (yellow) and NTERA-2 Cis (green). Heatmap illustrates 33 common differentially expressed miRNA with log2 transformed mean FC ( $p < 0.05$ ) in CDDP-resistant TGCT cell lines H12.1D and NTERA-2 Cis in comparison with -sensitive parental TGCT cell lines H12.1 and NTERA-2. Red colour indicates decreased relative expression and blue colour indicates increased relative expression.

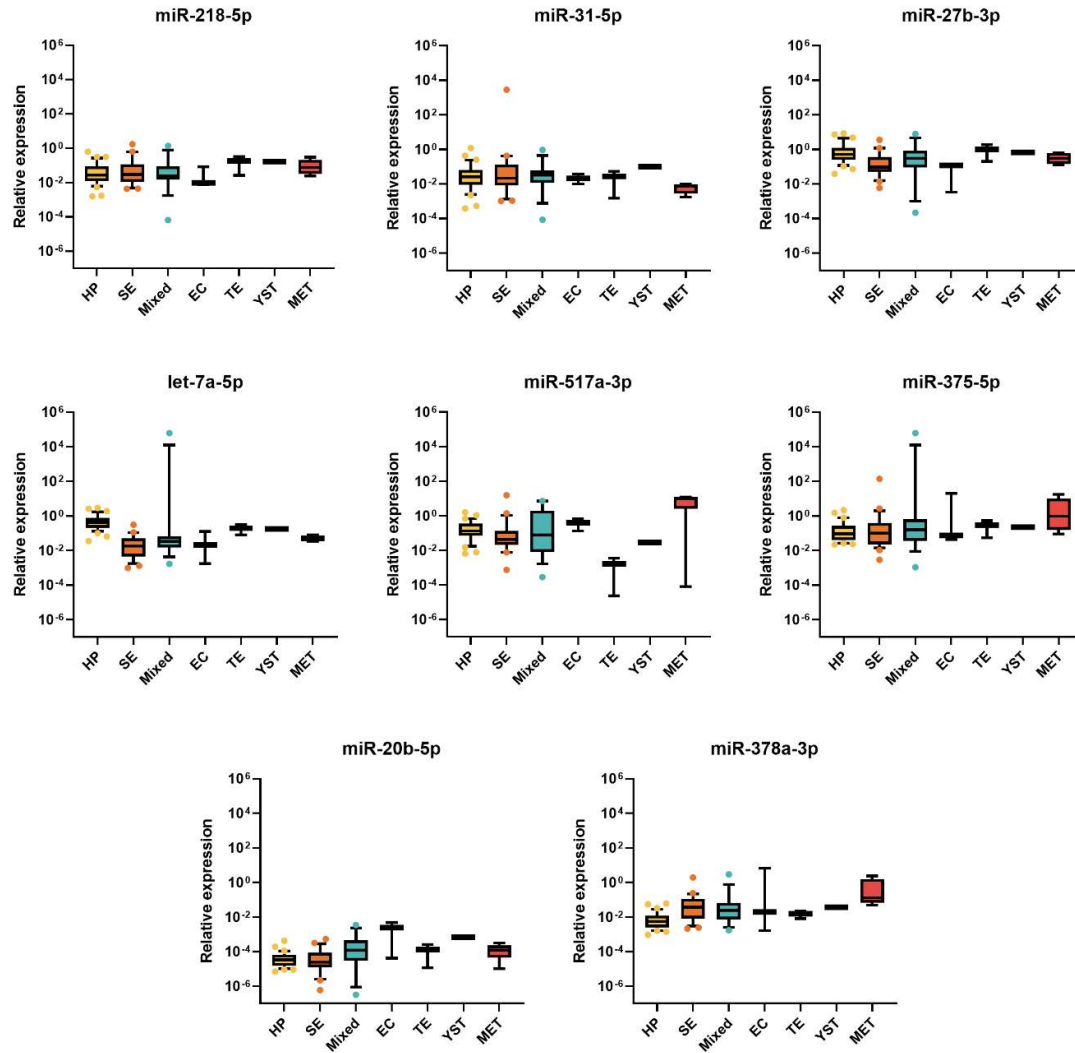

**Supplementary Figure S3: Expression of miRNA in a set of patient tumour samples according to histological classification.** Boxplots show relative miRNA expression ( $2^{-\Delta Ct}$ ) of miR-218-5p, miR-27b-3p, miR-517a-3p, miR-20b-5p, miR-31-5p, let-7a-5p, miR-375-5p and miR-378a-3p, normalized on geometric mean of SNORD44 and SNORD38B in primary tumour [seminoma (n = 23), mixed (n=18) EC (n = 4), TE (n = 2) and YST (n = 1)], metastatic (n = 5) and healthy parenchyma (n = 33) samples. Data are presented as median with interquartile range. Whiskers show 10-90 percentile. Abbreviations: Healthy parenchyma (HP), seminoma (SE), embryonal carcinoma (EC), teratoma (TE), yolk sac tumour (YST), metastasis (MET).

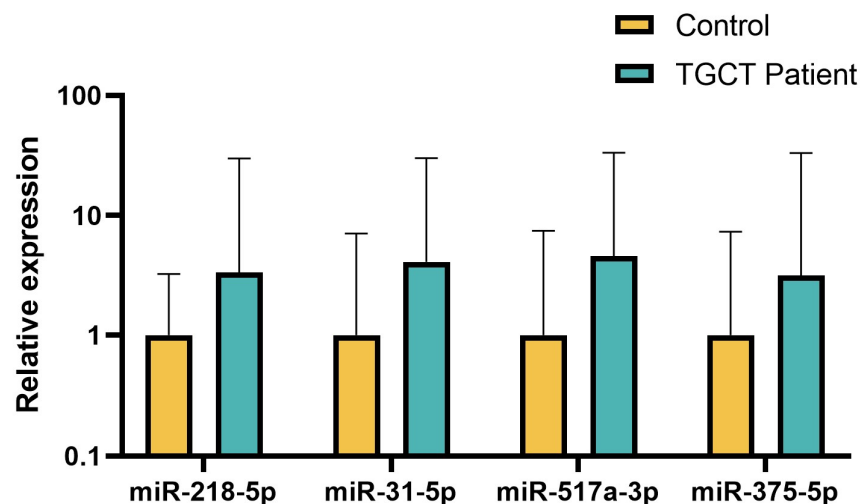

**Supplementary Figure S4: Quantification of miRNA in plasma samples of TGCT patients and healthy donors.** Bars represent relative miRNA expression ( $2^{-\Delta Ct}$ ) of miR-218-5p, miR-31-5p, miR-517a-3p and miR-375-5p, normalized on geometric mean of miR-191, SNORD44 and SNORD38B in plasma samples of TGCT patients ( $n = 12$ ) and healthy donors ( $n = 5$ ). Data are presented as mean FC ( $2^{-\Delta\Delta Ct}$ ) from three technical and three biological replicates. Error bars represent upper and lower limits of expression ( $2^{-\Delta\Delta Ct} \pm SD\Delta Ct$ ).

Supplementary Table S1: Overlap of the predicted target genes used for functional annotation analysis. The table lists specific pairwise overlap of predicted target genes of miR-218-5p, miR-31-5p and miR-199a-5p according to miRDB and Target Scan Human 8.0.

| miR-218-5p +<br>miR-31-5p +<br>miR-199a-5p | miR-218-5p<br>+ miR-31-5p | miR-218-5p +<br>miR-199a-5p | miR-31-5p +<br>miR-199a-5p |
|--------------------------------------------|---------------------------|-----------------------------|----------------------------|
| <i>ZBTB20</i>                              | <i>SLC6A6</i>             | <i>TOX3</i>                 | <i>SMARCD1</i>             |
| <i>FZD4</i>                                | <i>SOX11</i>              | <i>SHOC2</i>                | <i>RAB9B</i>               |
| <i>CACUL1</i>                              | <i>RHOBTB1</i>            | <i>TSPAN5</i>               | <i>PDE4D</i>               |
| <i>CEP85L</i>                              | <i>SLC5A3</i>             | <i>RFX3</i>                 | <i>ZDHHC21</i>             |
|                                            | <i>RIMS3</i>              | <i>SLC24A4</i>              | <i>PPP1R9A</i>             |
|                                            | <i>SNTB2</i>              | <i>RIMS1</i>                | <i>PREPL</i>               |
|                                            | <i>SATB2</i>              | <i>TSPAN3</i>               | <i>TENM4</i>               |
|                                            | <i>TACC1</i>              | <i>RLIM</i>                 | <i>CRYBG3</i>              |
|                                            | <i>SEPHS1</i>             | <i>WDR44</i>                | <i>GPRC5A</i>              |
|                                            | <i>SERTAD2</i>            | <i>RNF38</i>                | <i>CACNB2</i>              |
|                                            | <i>SPRED1</i>             | <i>PAN3</i>                 | <i>CLOCK</i>               |
|                                            | <i>PAX5</i>               | <i>RASSF2</i>               | <i>CBL</i>                 |
|                                            | <i>NUMB</i>               | <i>PPARGC1A</i>             | <i>GRB10</i>               |
|                                            | <i>NUFIP2</i>             | <i>KIT</i>                  | <i>CCNJ</i>                |
|                                            | <i>KDM5A</i>              | <i>ONECUT2</i>              | <i>LMAN2</i>               |
|                                            | <i>OXSR1</i>              | <i>KLHL29</i>               |                            |
|                                            | <i>LRRC55</i>             | <i>PDE7A</i>                |                            |
|                                            | <i>PCDH8</i>              | <i>KPNA4</i>                |                            |
|                                            | <i>POU2F1</i>             | <i>PURA</i>                 |                            |
|                                            | <i>PIK3C2A</i>            | <i>MIER3</i>                |                            |
|                                            | <i>FIGN</i>               | <i>RBM47</i>                |                            |
|                                            | <i>EGLN3</i>              | <i>NPAS2</i>                |                            |
|                                            | <i>DPY19L3</i>            | <i>NAA15</i>                |                            |
|                                            | <i>C11orf87</i>           | <i>GRIP1</i>                |                            |
|                                            | <i>EIF5A2</i>             | <i>FLRT3</i>                |                            |
|                                            | <i>DCBLD2</i>             | <i>HAPLN1</i>               |                            |
|                                            |                           | <i>AGO1</i>                 |                            |
|                                            |                           | <i>ARF6</i>                 |                            |
|                                            |                           | <i>CNOT6L</i>               |                            |
|                                            |                           | <i>BEND3</i>                |                            |
|                                            |                           | <i>EPHA7</i>                |                            |
|                                            |                           | <i>FUT9</i>                 |                            |
|                                            |                           | <i>GPR63</i>                |                            |
|                                            |                           | <i>CLCN3</i>                |                            |
|                                            |                           | <i>CNN1</i>                 |                            |
|                                            |                           | <i>GSK3B</i>                |                            |

**Supplementary Table S2:** STR profiles of TGCT cell lines used.

| Polymorfism | Cell line |     |    |            |    |  |        |     |    |       |      |    |          |      |  |
|-------------|-----------|-----|----|------------|----|--|--------|-----|----|-------|------|----|----------|------|--|
|             | 1411HP    |     |    | 1777NRpmet |    |  | 2102EP |     |    | H12.1 |      |    | H12.1ODM |      |  |
| Amelogenin  | X         | Y   |    | X          | Y  |  | X      | Y   |    | X     | X    |    | X        | X    |  |
| CSF1PO      | 10        | 10  |    | 10         | 10 |  | 11     | 12  |    | 10    | 12   |    | 10       | 12   |  |
| D13S317     | 14        | 14  |    | 8          | 11 |  | 8      | 8   |    | 11    | 11   |    | 11       | 11   |  |
| D16S539     | 9         | 11  |    | 10         | 13 |  | 11     | 12  |    | 13    | 13   |    | 13       | 13   |  |
| D18S51      | 17        | 17  |    | 14         | 14 |  | 15     | 15  |    | 13    | 15   | 16 | 13       | 16   |  |
| D19S433     | 14        | 14  |    | 14         | 14 |  | 13     | 14  |    | 13    | 14   |    | 13       | 13   |  |
| D21S11      | 31.2      | 32  |    | 30         | 31 |  | 28     | 29  |    | 30    | 31.2 |    | 30       | 31.2 |  |
| D2S1338     | 24        | 25  |    | 24         | 25 |  | 17     | 20  |    | 16    | 20   |    | 16       | 20   |  |
| D3S1358     | 14        | 14  |    | 16         | 18 |  | 16     | 16  |    | 16    | 17   | 18 | 17       | 18   |  |
| D5S818      | 12        | 12  |    | 13         | 13 |  | 11     | 11  |    | 11    | 12   |    | 11       | 12   |  |
| D7S820      | 9         | 9   |    | 10         | 10 |  | 7      | 13  |    | 8     | 11   |    | 8        | 11   |  |
| D8S1179     | 12        | 13  |    | 13         | 16 |  | 14     | 15  |    | 13    | 14   |    | 13       | 13   |  |
| FGA         | 22        | 22  |    | 27         | 27 |  | 22     | 22  |    | 20    | 21.2 | 22 | 20       | 21.2 |  |
| Penta D 0 0 | 0         | 0   |    | 0          | 0  |  | 0      | 0   |    | 0     | 0    |    | 0        | 0    |  |
| Penta E     | 0         | 0   |    | 0          | 0  |  | 0      | 0   |    | 0     | 0    |    | 0        | 0    |  |
| TH01        | 7         | 9,3 |    | 6          | 6  |  | 9      | 9,3 |    | 6     | 9.3  |    | 6        | 9.3  |  |
| TPOX        | 8         | 10  |    | 9          | 11 |  | 8      | 11  |    | 8     | 10   | 11 | 10       | 12   |  |
| vWA         | 14        | 18  | 19 | 18         | 20 |  | 16     | 17  | 18 | 14    | 15   |    | 14       | 15   |  |

Used database: Expasy – Cellosaurus



**Supplementary Table S3.** Characteristics of TGCT patients and tumour samples used in this study.

| Characteristic                    | TGCT patient     |
|-----------------------------------|------------------|
| n                                 | 48               |
| Primary tumour sample             | n = 48           |
| Metastasis sample                 | n = 5            |
| Age, Years, Median                | 29.5             |
| Tumour size mm (Mean $\pm$ SD)    | 5.03 $\pm$ 3.36  |
| Histologic type                   |                  |
| Seminoma                          | 23               |
| Mixed                             | 18               |
| Embryonal carcinoma               | 4                |
| Teratoma, postpubertal-type       | 2                |
| Yolk sac tumour, prepubertal-type | 1                |
| Metastasis at presentation        | 58.33 % (n = 28) |
| Vascular invasion                 | 52.08 % (n = 25) |
| Adjuvant chemotherapy             | 72.92 % (n = 35) |
| Vital status                      |                  |
| Alive, no evidence of disease     | 91.67 % (n = 44) |
| Died from disease                 | 6.25 % (n = 3)   |
| Alive, active disease             | 2.08 % (n = 1)   |
| Disease relapse                   |                  |
| No                                | 77.08 % (n = 37) |
| Yes                               | 12.5 % (n = 6)   |
| Progression                       | 10.42 % (n = 5)  |
| TNM classification                |                  |
| I (39.58 %, n = 19)               |                  |
| IA                                | 42.11 % (n = 8)  |
| IB                                | 31.58 % (n = 6)  |
| IS                                | 21.05 % (n = 4)  |
| II (37.5 %, n = 18)               |                  |
| IIA                               | 50 % (n = 9)     |
| IIB                               | 27.78 % (n = 5)  |
| IIC                               | 16.67 % (n = 3)  |
| III (20.83 %, n = 10)             |                  |
| IIIA                              | 10 % (n = 1)     |
| IIIB                              | 60 % (n = 6)     |
| IIIC                              | 30 % (n = 3)     |
| NA                                | 2.08 % (n = 1)   |
| IGCCCG                            |                  |
| Good                              | 45.83 % (n = 22) |
| Intermediate                      | 6.25 % (n = 3)   |
| Poor                              | 6.25 % (n = 3)   |
| NA                                | 41.67 % (n = 20) |

n of healthy parenchyma tissue = 33, median age = 55 (14 – 87), \*metastasis samples were acquired from the same patients with primary tumour – four different metastasis samples were from the same patient and one sample from another patient.

**Supplementary Table S4. Characteristics of TGCT patients whose plasma samples were used in this study.**

| Characteristics                    | TGCT patient     |
|------------------------------------|------------------|
| n                                  | 12               |
| Age, Years, Median                 | 37               |
| Tumour size mm (Mean $\pm$ SD)     | 6.04 $\pm$ 2.78  |
| Histologic type                    |                  |
| Seminoma                           | n = 6            |
| Mixed                              | n = 4            |
| Yolk sac tumour, postpubertal-type | n = 1            |
| Embryonal carcinoma                | n = 1            |
| Metastasis at presentation         | 41.67 % (n = 5)  |
| Adjuvant chemotherapy              | 100 % (n = 12)   |
| Vital status                       |                  |
| Alive with no disease              | 100 % (n = 12)   |
| Disease relapse                    |                  |
| No                                 | 91.67 % (n = 11) |
| Yes                                | -                |
| Progression                        | 8.33 % (n = 1)   |
| TNM classification                 |                  |
| I (58.33 %, n = 7)                 |                  |
| IB                                 | 85.71 % (n = 6)  |
| IS                                 | 14.29 % (n = 1)  |
| II (16.67 %, n = 2)                |                  |
| IIA                                | 100 % (n = 2)    |
| III (25 %, n = 3)                  |                  |
| IIIA                               | 33.33% (n = 1)   |
| IIIB                               | 33.33% (n = 1)   |
| IIIC                               | 33.33% (n = 1)   |
| IGCCCG                             |                  |
| Good                               | 25 % (n = 3)     |
| Intermediate                       | 8.33 % (n = 1)   |
| Poor                               | 8.33 % (n = 1)   |
| NA                                 | 58.33 % (n = 7)  |

n of healthy donor plasma samples = 5, median age = 33 (28 – 35).
